# Supplementary material for: Who's the Boss? Assessing Convergent Validity of Aggression Based Dominance Measures in Male Laboratory Mice, Mus Musculus
Source: PubMed Central journal article supplement (PMC8301077; doi:10.3389/fvets.2021.695948), 2021-07-09
Supplement: Data_Sheet_2.pdf [file Data_Sheet_2.pdf]

## *Supplementary Material*

### 1 Supplementary Figures and Tables

**Supplementary Table 1.** Count of cages used for final analysis, broken down by strain and group size.

|                                         | <b>Total Cages</b> | <b>SJL- 3</b> | <b>SJL- 5</b> | <b>Albino B6- 3<sup>1</sup></b> | <b>Albino B6- 5</b> |
|-----------------------------------------|--------------------|---------------|---------------|---------------------------------|---------------------|
| Social network analysis                 | 20                 | 5             | 6             | 4                               | 5                   |
| Dominance measure-convergent validity   | 18                 | 4             | 6             | 3                               | 5                   |
| Dominance measure-discriminant validity | 19                 | 5             | 6             | 3                               | 5                   |

<sup>1</sup>One cage was euthanized between day 2 and 7 of video data. Data from day 2 was included in social network analyses.

**Supplementary Table 2.** Count of experiment units (either cage or mouse) used in each social network analysis and dominance measure model. The number of video days observed is indicated where applicable.

|                                                                          | <b>Cages</b> | <b>Mice</b> | <b>Sampling Unit</b> | <b>Units with two days of behavior data</b> | <b>Units with one day of behavior data</b> |
|--------------------------------------------------------------------------|--------------|-------------|----------------------|---------------------------------------------|--------------------------------------------|
| <b>Social network analysis</b>                                           |              |             |                      |                                             |                                            |
| Aim 1- power distribution                                                | 20           | 82          | cage                 | 18                                          | 2                                          |
| Aim 2- influences on Glicko score                                        | 20           | 82          | mouse                | 74                                          | 8                                          |
| Aim 3- relationship between submission performed and aggression received | 20           | 82          | mouse                | 74                                          | 8                                          |
| Aim 4- likelihood of submission following social investigation           | 18           | 74          | mouse                | 74                                          | 0                                          |
| <b>Dominance measures</b>                                                |              |             |                      |                                             |                                            |
| Glicko score                                                             | 19           | 38          | mouse                | 36                                          | 2                                          |
| Preputial gland ratio                                                    | 19           | 38          | mouse                | ---                                         | ---                                        |
| Time in center of OFM                                                    | 19           | 38          | mouse                | ---                                         | ---                                        |
| Fecal boli in OFM                                                        | 19           | 38          | mouse                | ---                                         | ---                                        |
| Darcin                                                                   | 18           | 36          | mouse                | ---                                         | ---                                        |
| Tube test scores                                                         | 19           | 38          | mouse                | ---                                         | ---                                        |
| Average posterior PALS score                                             | 19           | 38          | mouse                | ---                                         | ---                                        |

**Supplementary Table 3.** Loading values from principal component analysis of tube test scores over three rounds. Only the first component had an eigenvalue over 1.

| <b>Tube Test PC</b>                 |         |
|-------------------------------------|---------|
| Tube Test Round 1                   | 0.90062 |
| Tube Test Round 2                   | 0.96658 |
| Tube Test Round 3                   | 0.90369 |
| <b>Eigenvalue</b>                   | 2.56    |
| <b>Total variance explained (%)</b> | 85.4    |

**Supplementary Table 4.** Least square mean  $\pm$  SE for each strain\*group size combination from general linear models of standardized measures tested for convergent validity.

|                              | <b>SJL - 3</b>       | <b>SJL - 5</b>       | <b>Albino B6 - 3</b> | <b>Albino B6 - 5</b> |
|------------------------------|----------------------|----------------------|----------------------|----------------------|
| Change in Glicko-Agg score   | -0.0101 $\pm$ 0.0616 | -0.0068 $\pm$ 0.0601 | 0.1098 $\pm$ 0.0760  | 0.0747 $\pm$ 0.0685  |
| Change in Glicko-Sub score   | -0.0566 $\pm$ 0.0847 | -0.0520 $\pm$ 0.0827 | 0.2011 $\pm$ 0.1046  | 0.0404 $\pm$ 0.0942  |
| Preputial gland ratio        | -0.2622 $\pm$ 0.3138 | -0.3545 $\pm$ 0.3065 | 0.4057 $\pm$ 0.3876  | 0.6597 $\pm$ 0.3489  |
| Urinary darcin               | -0.5546 $\pm$ 0.2374 | -0.6397 $\pm$ 0.2250 | 0.7949 $\pm$ 0.2836  | 1.1178 $\pm$ 0.2565  |
| Tube test score-round 1      | 0.1077 $\pm$ 0.2221  | -0.5201 $\pm$ 0.2169 | -0.6075 $\pm$ 0.2743 | -0.1921 $\pm$ 0.2470 |
| Tube test score-round 2      | 0.2318 $\pm$ 0.2421  | -0.3185 $\pm$ 0.2364 | -0.4560 $\pm$ 0.2990 | -0.1167 $\pm$ 0.2692 |
| Tube test score-round 3      | 0.0885 $\pm$ 0.2778  | -0.1854 $\pm$ 0.2713 | -0.5723 $\pm$ 0.3431 | -0.1225 $\pm$ 0.3089 |
| Average posterior PALS score | 0.6155 $\pm$ 0.2037  | 0.6368 $\pm$ 0.1989  | -0.5242 $\pm$ 0.2515 | -0.4631 $\pm$ 0.2265 |

**Supplementary Table 5.** Correlation coefficients of dominance measure residuals used in the factor analyses and subsequent general linear models.

|                                       | <b>Change<br/>in<br/>Glicko-<br/>Agg<br/>score</b> | <b>Change<br/>in<br/>Glicko-<br/>Sub<br/>score</b> | <b>Preputial<br/>gland<br/>ratio</b> | <b>Urinary<br/>darcin</b> | <b>Tube test<br/>score-<br/>round 1</b> | <b>Tube test<br/>score-<br/>round 2</b> | <b>Tube test<br/>score-<br/>round 3</b> | <b>Average<br/>posterior<br/>PALS<br/>score</b> |
|---------------------------------------|----------------------------------------------------|----------------------------------------------------|--------------------------------------|---------------------------|-----------------------------------------|-----------------------------------------|-----------------------------------------|-------------------------------------------------|
| Change in<br>Glicko-<br>Agg score     | 1.0000                                             | 0.9762                                             | 0.6528                               | 0.4514                    | -0.3280                                 | -0.2747                                 | -0.3071                                 | -0.5291                                         |
| Change in<br>Glicko-<br>Sub score     | 0.9762                                             | 1.0000                                             | 0.6209                               | 0.4004                    | -0.3143                                 | -0.2893                                 | -0.2996                                 | -0.5869                                         |
| Preputial<br>Gland<br>Ratio           | 0.6528                                             | 0.6209                                             | 1.0000                               | 0.5583                    | -0.2983                                 | -0.2524                                 | -0.2808                                 | -0.4193                                         |
| Urinary<br>darcin                     | 0.4514                                             | 0.4004                                             | 0.5583                               | 1.0000                    | -0.3169                                 | -0.3460                                 | -0.4817                                 | -0.0280                                         |
| Tube test<br>score-<br>round 1        | -0.3280                                            | -0.3143                                            | -0.2983                              | -0.3169                   | 1.0000                                  | 0.7972                                  | 0.6274                                  | 0.4409                                          |
| Tube test<br>score-<br>round 2        | -0.2747                                            | -0.2893                                            | -0.2524                              | -0.3460                   | 0.7972                                  | 1.0000                                  | 0.8387                                  | 0.4873                                          |
| Tube test<br>score-<br>round 3        | -0.3071                                            | -0.2996                                            | -0.2808                              | -0.4817                   | 0.6274                                  | 0.8387                                  | 1.0000                                  | 0.4507                                          |
| Average<br>posterior<br>PALS<br>score | -0.5291                                            | -0.5869                                            | -0.4193                              | -0.0280                   | 0.4409                                  | 0.4873                                  | 0.4507                                  | 1.0000                                          |

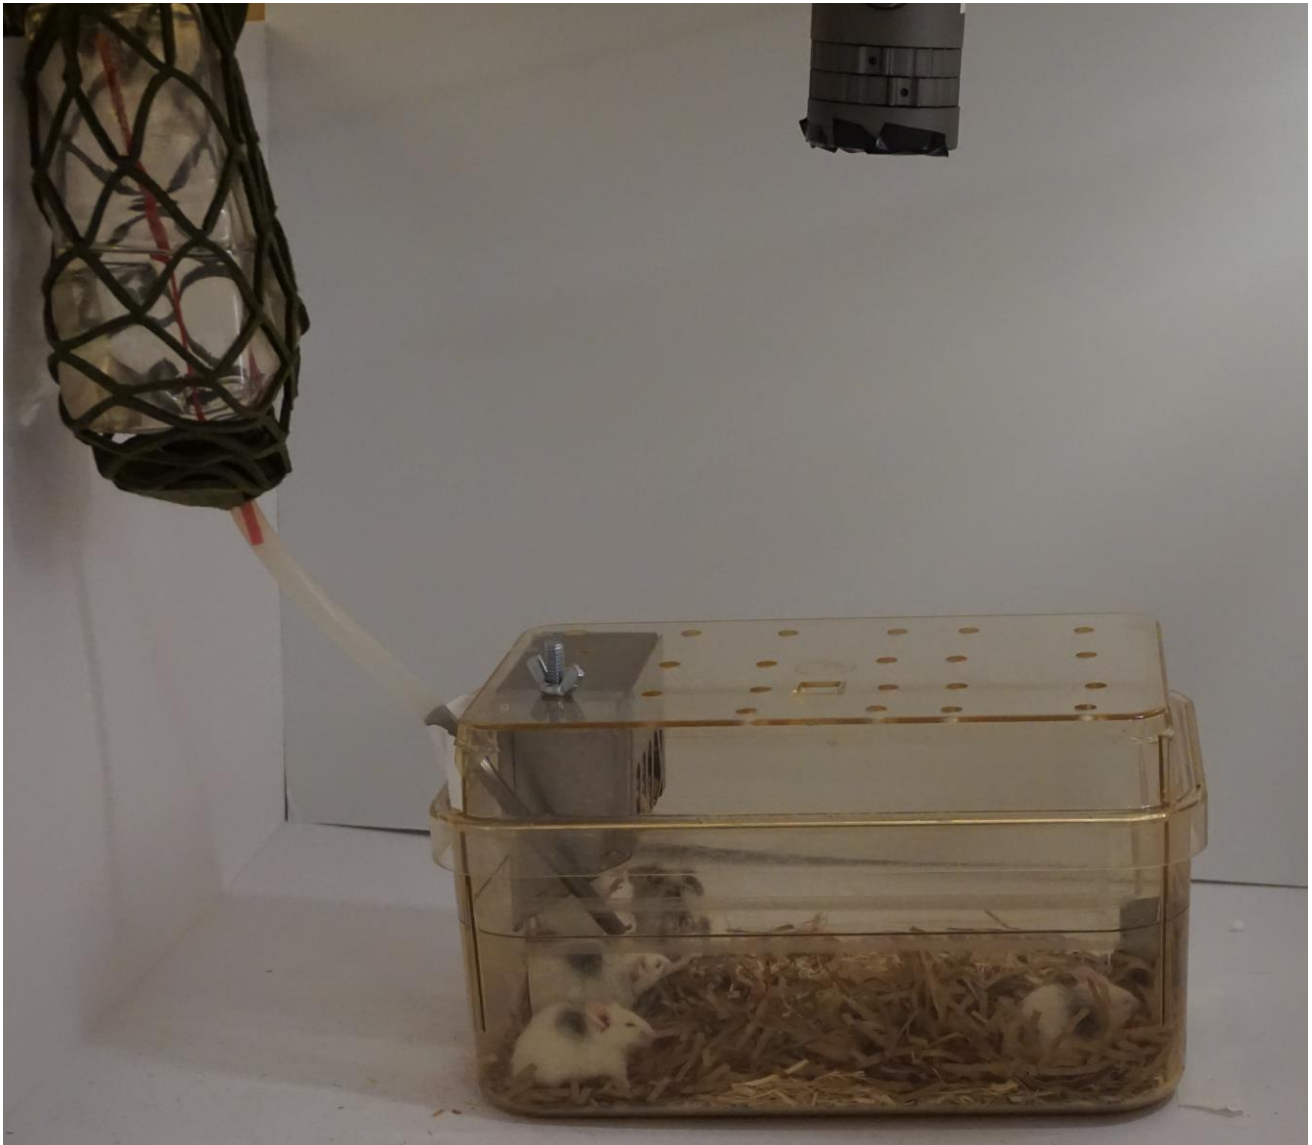

**Supplementary Figure 1.** Custom caging for home cage observations. Holes were drilled into polysulfone lids for air exchange on static racks. A metal feeder was secured to the lid using a nut and bolt. An external water bottle was accessible through a hole in the side of the lid and connected using medical grade silicone tubing and a metal water sipper. These cages allowed for overhead monitoring using CCTV cameras, one of which can be seen at the top of the figure.
